# Supplementary material for: Materials, Structures, and Applications of iTENGs
Source: MDPI journal article supplement (doi:10.3390/coatings13081407), 2023-08-10
Supplement: s1 [file s1]

Archive with 1 entries (1 files):
- coatings-2507879-supplementary.pdf
