# Supplementary figures and images for: Materials, Structures, and Applications of iTENGs
Source: MDPI journal article supplement (doi:10.3390/coatings13081407), 2023-08-10

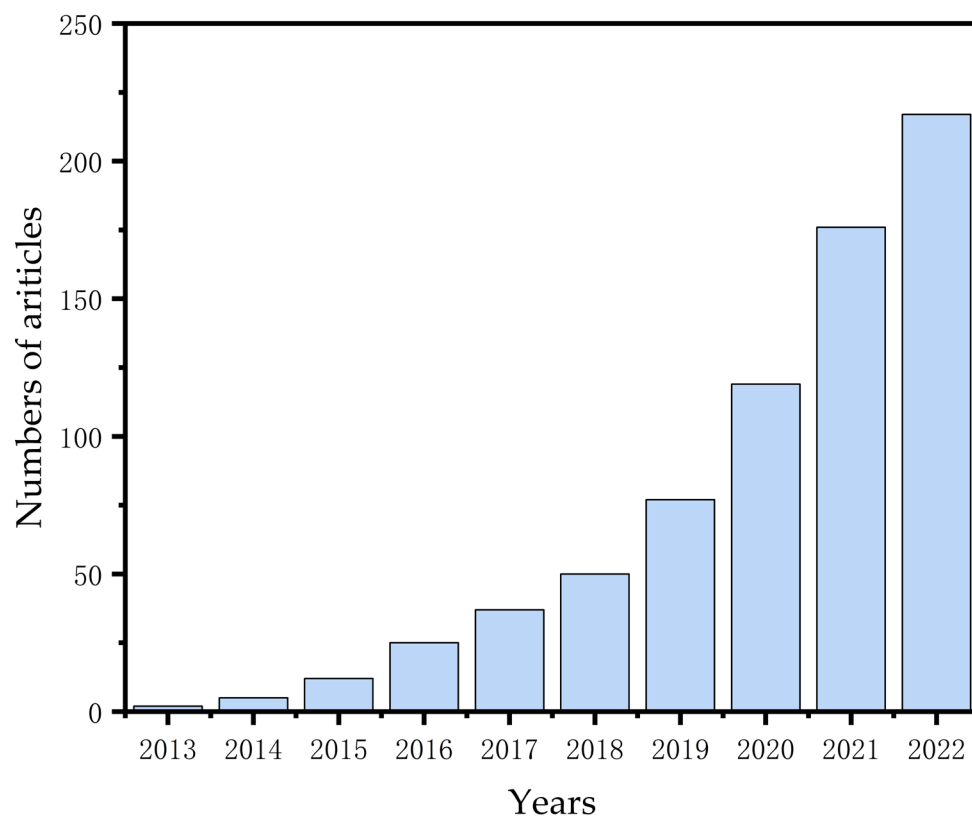

**Figure S1.** Number of publications about iTENG over the years.

Supplement: s1 [file s1 › coatings-2507879-supplementary.pdf]
